# Supplementary material for: Self-Help Groups within Nursing Homes: The Experiences of Family Caregivers in Northeastern Italy
Source: MDPI journal article supplement (doi:10.3390/bs13060485), 2023-06-08
Supplement: s1 [file s1]

# ANALYSIS OF THE INTERVIEWS

## INTERPRETATIVE PHENOMENOLOGICAL ANALYSIS

### AUDIT TRAIL

| Participants                                              | Emergent Themes                                    | Super-ordinate Themes                                                                        | Cross-case Themes                                           |
|-----------------------------------------------------------|----------------------------------------------------|----------------------------------------------------------------------------------------------|-------------------------------------------------------------|
| MARA                                                      | Home placement as a negative place                 | Caregivers' experience with respect to nursing home placement                                | Caregivers' challenge: Reconnecting the dots                |
|                                                           | Sense of guilt                                     | Emotional and physical burden of caregiving                                                  |                                                             |
|                                                           | Physical exhaustion                                |                                                                                              |                                                             |
|                                                           | Loneliness                                         |                                                                                              |                                                             |
|                                                           | Self-doubt                                         | Sociocultural expectations of caregiving                                                     | The material and collective experience as stabilizing tools |
|                                                           | Physical connection                                | Caregiver's positive feelings                                                                |                                                             |
|                                                           | Relevance of time                                  | Caregivers' experience with respect to participating in a self-help group                    |                                                             |
|                                                           | Sharing with other people                          |                                                                                              |                                                             |
| Self-help groups                                          |                                                    |                                                                                              |                                                             |
| GRAZIELLA                                                 | COVID-19 impact                                    | Caregivers' experience with respect to nursing home placement during COVID-19                | Caregivers' challenge: Reconnecting the dots                |
|                                                           | Sense of anger                                     | Caregiver's negative feelings                                                                |                                                             |
|                                                           | Caregiver's physical discomfort                    |                                                                                              |                                                             |
|                                                           | Sense of guilt                                     |                                                                                              |                                                             |
|                                                           | Sense of injustice                                 | Caregiver's positive feelings                                                                | The material and collective experience as stabilizing tools |
|                                                           | The time of life                                   |                                                                                              |                                                             |
|                                                           | Home placement as a positive place                 |                                                                                              |                                                             |
|                                                           | Self-help groups                                   | Caregivers' experience with respect to the patient's disease and changes in the relationship |                                                             |
|                                                           | Relational improvement                             |                                                                                              |                                                             |
|                                                           | Sharing feelings with others                       | Caregivers' experience with respect to participating in a self-help group                    |                                                             |
| MELANIA                                                   | Sense of guilt                                     | Caregiver's negative feelings                                                                | Caregivers' challenge: Reconnecting the dots                |
|                                                           | Caregiver's physical exhaustion                    |                                                                                              |                                                             |
|                                                           | Home placement as a negative place                 |                                                                                              |                                                             |
|                                                           | Fear of death                                      |                                                                                              |                                                             |
|                                                           | COVID-19 impact                                    |                                                                                              |                                                             |
|                                                           | Positive relational transformation                 | Experiencing transformations in relationships                                                | The material and collective experience as stabilizing tools |
|                                                           | Self-help groups                                   |                                                                                              |                                                             |
| GIORGIO                                                   | Home placement as an experiential place            | Caregiver's negative experiences                                                             | Caregivers' challenge: Reconnecting the dots                |
|                                                           | Sense of loneliness and home desire                |                                                                                              |                                                             |
|                                                           | COVID-19 impact                                    |                                                                                              |                                                             |
|                                                           | Death as freedom                                   | Changing in views about death                                                                | The material and collective experience as stabilizing tools |
|                                                           | Self-help groups                                   | Caregivers' experience with respect to participating in a self-help group                    |                                                             |
| LAURA                                                     | Caregiver's loneliness                             | Caregiver's negative feelings                                                                | Caregivers' challenge: Reconnecting the dots                |
|                                                           | Sense of guilt                                     |                                                                                              |                                                             |
|                                                           | Anger and affliction                               |                                                                                              |                                                             |
|                                                           | Loss of dignity                                    |                                                                                              |                                                             |
|                                                           | Diagnosis as a turning point in the emotional life | Experiencing transformations in the relationship with the loved one                          | The material and collective experience as stabilizing tools |
|                                                           | Relational transformation                          |                                                                                              |                                                             |
|                                                           | Self-help groups                                   |                                                                                              |                                                             |
| Sharing feelings and emotions within the self-help groups | Emotional legitimization in self-help groups       |                                                                                              |                                                             |
| REGINA                                                    | Physical exhaustion                                | Negative feelings                                                                            | Caregivers' challenge: Reconnecting the dots                |
|                                                           | Sadness and sorrow                                 |                                                                                              |                                                             |
|                                                           | COVID-19 impact                                    |                                                                                              |                                                             |
|                                                           | Sense of guilt                                     | Caregiver's needs                                                                            |                                                             |
|                                                           | Physical contact                                   |                                                                                              |                                                             |
|                                                           | Home placement as a transitional moment            |                                                                                              |                                                             |
|                                                           | Self-help groups                                   | Sharing as a meaningful reference frame                                                      | The material and collective experience as stabilizing tools |
